# Supplementary material
Source: PubMed Central journal article supplement (PMC4892843)
Supplement: NIHMS789433-supplement-Supplemental.pdf [file NIHMS789433-supplement-Supplemental.pdf]

# Observing Metal-catalyzed Chemical Reactions in situ using Surface-enhanced Raman Spectroscopy on Pd-Au Nanoshells

Kimberly N. Heck, Benjamin G. Janesko, Gustavo E. Scuseria, Naomi J. Halas, Michael  
S. Wong

## Supplementary Information

### Description of DFT calculations on chemisorbed 1,1-DCE

All calculations were performed with a development version of the Gaussian electronic structure program<sup>1</sup>. Calculations use the B3LYP<sup>2-5</sup> density functional, with (unless noted otherwise) the LANL2DZ basis set and effective core potential<sup>6-8</sup> on Pd and the 6-31+G(d,p) basis on other atoms. Calculations use “Tight” convergence criteria for SCF iterations and geometry optimizations, and a pruned (99,590) “UltraFine” integration grid. No solvent model is included. All systems are assumed to be in the lowest possible spin state, and singlet calculations are spin-restricted. Spatial symmetry is ignored except where noted. Calculated vibrational frequencies are scaled by a factor of 0.98 as recommended in Ref. 9. Table S1 compares experimental (CCCBDB, Ref. 12) and calculated vibrational frequencies for 1,1-DCE evaluated using various basis sets. The 6-31+G(d,p) basis provides a reasonable compromise between accuracy and efficiency, with a mean absolute error (MAE) of 26 cm<sup>-1</sup> versus experiment. This is deemed sufficient for the desired semiquantitative interpretations of experiment.

Table S1: Calculated (B3LYP) and experimental vibrational frequencies of 1,1-DCE, and assignments.

| Symm | Assignment                 | Exptl | LANL2DZ | 6-31+G(d,p) | 6-311++G(3df,3pd) |
|------|----------------------------|-------|---------|-------------|-------------------|
| A1   | C-H symmetric stretch      | 3035  | 3127    | 3123        | 3109              |
| A1   | <b>C-C stretch</b>         | 1627  | 1635    | 1635        | 1627              |
| A1   | <b>CH<sub>2</sub> bend</b> | 1400  | 1396    | 1380        | 1383              |
| A1   | C-Cl symmetric stretch     | 603   | 533     | 585         | 588               |
| A1   | CCl <sub>2</sub> bend      | 299   | 276     | 296         | 295               |
| A2   | CH <sub>2</sub> twist      | 686   | 675     | 676         | 686               |
| B1   | CH <sub>2</sub> wag        | 875   | 931     | 875         | 897               |
| B1   | CCl <sub>2</sub> wag       | 460   | 428     | 463         | 471               |
| B2   | C-H antisymmetric stretch  | 3130  | 3236    | 3219        | 3203              |
| B2   | C-C-H bend, C-Cl stretch   | 1095  | 1079    | 1073        | 1080              |
| B2   | C-Cl antisymmetric stretch | 800   | 706     | 755         | 756               |
| B2   | Cl-C-C bend                | 372   | 357     | 373         | 374               |
| MAE  | --                         | --    | 44      | 26          | 23                |

Table S2 presents calculated frequencies of the Raman-active C-C stretch and CH<sub>2</sub> bend vibrational modes of 1,1-DCE and various substitution products bound to Pd clusters. These vibrational modes are marked in bold in Table S1. (All calculated modes involve some coupling between C-C stretching and CH<sub>2</sub> bending, and are tabulated based on the dominant contribution.) The calculated Raman activities (not shown) are always appreciable for both modes. The C-C stretch frequency has previously been shown to provide a sensitive probe of ethylene adsorption geometry<sup>10</sup>. We find that the C-C stretch frequency dramatically decreases as DCE goes from free, to  $\pi$ -bound, to di- $\sigma$ -bound, while the CH<sub>2</sub> bend frequency is not significantly affected. The intense SERS peaks seen experimentally below  $\sim 1200\text{ cm}^{-1}$  are most consistent with di- $\sigma$ -coordinated DCE.

The calculated vibrational frequencies of a mono-dechlorinated product obtained by replacing one Cl atom with Pd are rather strongly dependent on the cluster model. Neutral 1-chloro-1-palladio-ethylene is a radical with a Cl-C-Pd angle ( $121^\circ$ ) close to the

Cl-C-Cl angle in 1,1-DCE ( $114^\circ$ ), and with C-C stretch and  $\text{CH}_2$  bend frequencies similar to  $\pi$ -bound DCE. In contrast, the corresponding closed-shell cation has a much smaller Cl-C-Pd angle ( $93^\circ$ ), and C-C stretch and  $\text{CH}_2$  bend frequencies similar to gas-phase DCE. The calculated Raman spectra (not shown) have several other intense peaks below 1000 wavenumber, suggesting that the mono-dechlorinated product may be rather uncommon in the experimental spectra. Calculations on monodechlorinated DCE on larger Pd cluster models tended to converge to geometries with dissociated C-Cl bonds, providing additional evidence that the monodechlorinated product is unstable.

The vibrational spectrum of fully dechlorinated vinylidene ( $\text{C}=\text{CH}_2$ ) bound to Pd also shows some dependence on the binding motif. A neutral two-atom Pd cluster gives neutral, closed-shell 1,1-di-palladio-ethylene, with calculated C-C stretch and  $\text{CH}_2$  bend frequencies comparable to 1,1-DCE. We also explored vinylidene bound to atop, bridge, and threefold sites of a neutral tetrahedral  $\text{Pd}_4$  cluster. The threefold site is most energetically stable, as seen by Clotet and coworkers<sup>11</sup>, with bridge and atop sites calculated 12 and 45 kcal/mol higher in energy. The calculated C-C stretch frequency is significantly reduced for the threefold site, and significantly increased for the atop site. These calculations suggest that the Raman-active C-C stretch vibration of chemisorbed vinylidene may occur between 1350 and 1700  $\text{cm}^{-1}$ , with the lower end corresponding to more highly coordinated (and presumably more realistic) models. The calculations also suggest that high-frequency modes 1800-2000  $\text{cm}^{-1}$  may correspond to  $\text{CH}_2$  bending vibrations of surface-bound vinylidene.

Table S2: Selected vibrational frequencies calculated for adsorbates on Pd cluster models.

| System                                  | C-C stretch | CH <sub>2</sub> bend |
|-----------------------------------------|-------------|----------------------|
| 1,1-DCE                                 | 1635        | 1380                 |
| Pd-DCE ( $\pi$ )                        | 1276        | 1452                 |
| Pd <sub>2</sub> -DCE (di- $\sigma$ )    | 1115        | 1405                 |
| 1-chloro-1-palladio-ethylene            | 1295        | 1480                 |
| 1-chloro-1-palladio-ethylene(+)         | 1654        | 1353                 |
| 1,1-di-palladio-ethylene                | 1617        | 1324                 |
| Pd <sub>4</sub> -vinylidene (bridge)    | 1567        | 1340                 |
| Pd <sub>4</sub> -vinylidene (atop)      | 1685        | 1288                 |
| Pd <sub>4</sub> -vinylidene (threefold) | 1382        | 2034                 |

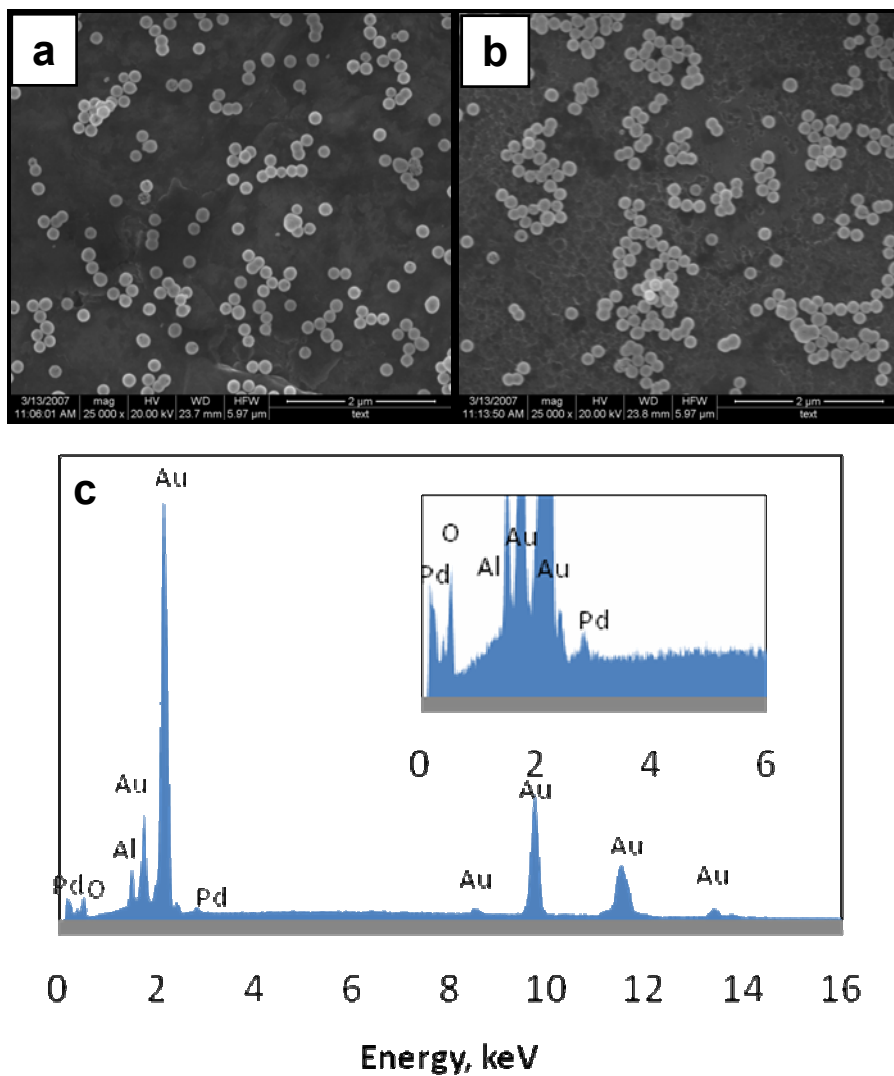

**Figure S1.** SEM images of (a) Au NSs and (b) Pd/Au NSs, and (c) EDS of Pd/Au NSs (Inset: Pd region).

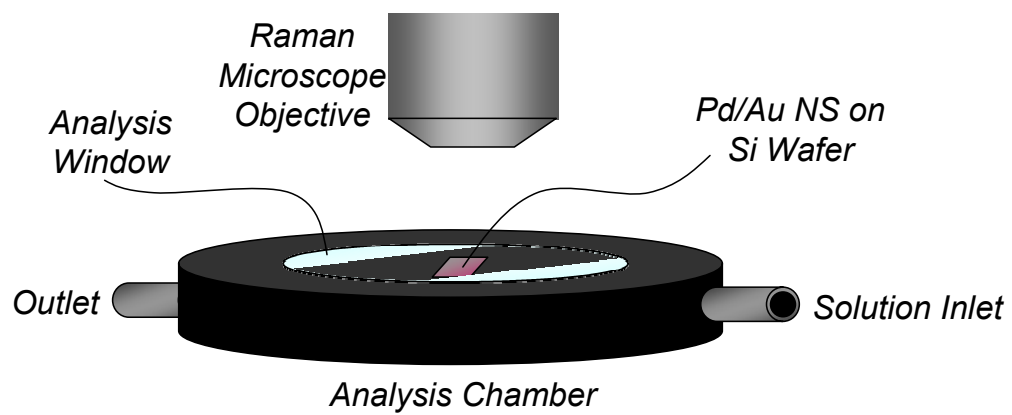

**Figure S2.** Schematic of flow chamber.

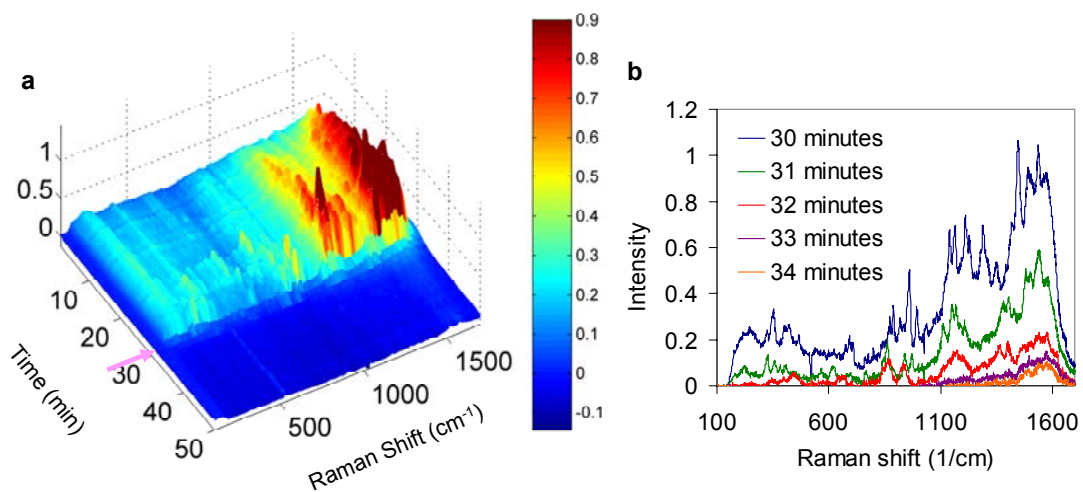

**Figure S3.** Waterfall plot of chemisorption of 254.4  $\mu\text{M}$  1,1-DCE followed by the addition of 81 mM  $\text{H}_2$  in  $\text{H}_2\text{O}$ : (a) 1,1-DCE solution injected at  $t=0$ ,  $\text{H}_2$  in  $\text{H}_2\text{O}$  added after 30 minutes, and (b) series of SERS spectra before and after addition of  $\text{H}_2$  in  $\text{H}_2\text{O}$ .

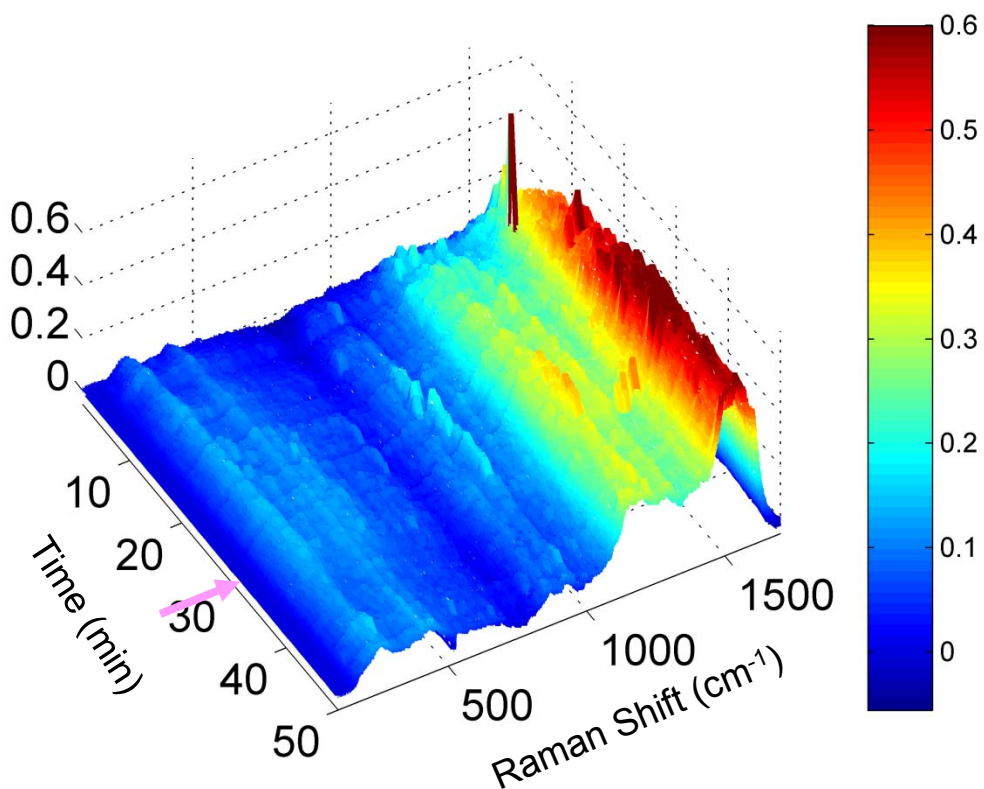

**Figure S4.** Waterfall plot of chemisorption of  $254.4 \mu\text{M}$  1,1-DCE followed by the addition of  $\text{N}_2$  saturated water. 1,1-DCE solution injected at  $t=0$ ,  $\text{N}_2$  saturated water added after 30 minutes.



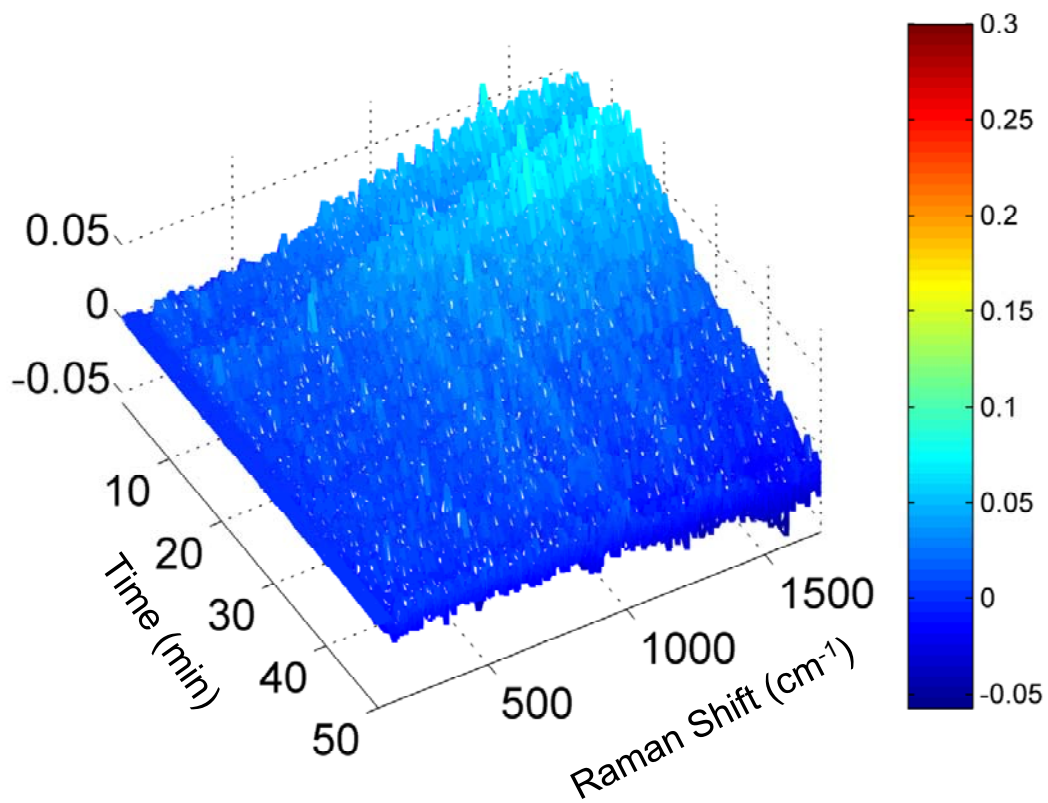

**Figure S5.** Waterfall plot of chemisorption of 254.4  $\mu\text{M}$  1,1-DCE over Au NSs.

## References

1. Frisch, M. J., Trucks, G. W., Schlegel, H. B., Scuseria, G. E., *et al.*, *Gaussian Development Version, Revision F.02*, Gaussian, Inc.: Wallingford CT, 2006.
2. Stephens, P. J.; Devlin, F. J.; Chabalowski, C. F.; Frisch, M. J., *J. Phys. Chem.* **1994**, 98, 11623.
3. Becke, A. D., *J. Chem. Phys.* **1993**, 98, 5648.
4. Lee, C. T.; Yang, W. T.; Parr, R. G., *Phys. Rev. B* **1988**, 37, 785.
5. Vosko, S. H.; Wilk, L.; Nusair, M., *Can. J. Phys.* **1980**, 58, 1200.
6. Hay, P. J.; Wadt, W. R., *J. Chem. Phys.* **1985**, 82, 270.
7. Hay, P. J.; Wadt, W. R., *J. Chem. Phys.* **1985**, 82, 284.
8. Hay, P. J.; Wadt, W. R., *J. Chem. Phys.* **1985**, 82, 299.
9. Cardini, G.; Muniz-Miranda, M.; Pagliai, M.; Schettino, V., *Theor. Chem. Acc.* **2007**, 117, 451.
10. Stuve, E. M.; Madix, R. J., *J. Phys. Chem.* **1985**, 89, 3183.
11. Clotet, A.; Ricart, J. M.; Pacchioni, G., *J. Mol. Struct. (THEOCHEM)* **1999**, 458, 123.
12. NIST Computational Chemistry Comparison and Benchmark DataBase, NIST Standard Reference Database Number 101, Release 14, September 2006, Editor: Russell D. Johnson III, <http://srdata.nist.gov/cccbdb>
